# Supplementary material for: A Simple Method for the Prediction of Therapeutic Proteins (Monoclonal and Polyclonal Antibodies and Non-Antibody Proteins) for First-in-Pediatric Dose Selection: Application of Salisbury Rule
Source: MDPI journal article supplement (doi:10.3390/antib11040066), 2022-10-21
Supplement: s1 [file s1]

Supplementary material

**Table S1.** Predicted and observed dose of monoclonal antibodies.

| Age                                                                                                                          | BW (kg)      | Observed Dose (mg) |          | Predicted | Ratio     | Ratio    |
|------------------------------------------------------------------------------------------------------------------------------|--------------|--------------------|----------|-----------|-----------|----------|
|                                                                                                                              |              | PI based           | CL based | Salisbury | Salisbury | CL based |
| Basiliximab, Adult Dose = 20 mg, Pediatric Dose = 12 mg/m², Liver transplantation, Ref [1]                                   |              |                    |          |           |           |          |
| <2 years                                                                                                                     | 10 (0.29 m²) | 3.5                | 6.9      | 4.0       | 1.15      | 0.58     |
| 3.5 years                                                                                                                    | 20 (0.79 m²) | 9.5                | 8.7      | 8.0       | 0.84      | 0.92     |
| 8.6 years                                                                                                                    | 35 (1.2 m²)  | 14.4               | 10.2     | 13.0      | 0.90      | 1.28     |
| 13.5 years                                                                                                                   | 50 (1.4 m²)  | 16.8               | 17.8     | 16.0      | 0.95      | 0.90     |
| Basiliximab, Adult Dose = 20 mg, Pediatric Dose = 12 mg/m², Renal transplantation, Ref [2]                                   |              |                    |          |           |           |          |
| 1-4 years                                                                                                                    | 25 (0.92 m²) | 11.0               | 8.1      | 10.0      | 0.91      | 1.23     |
| 6-12 years                                                                                                                   | 40 (1.3 m²)  | 15.6               | 10.3     | 16.0      | 1.03      | 1.36     |
| 14-16 years                                                                                                                  | 55 (1.6 m²)  | 19.2               | 16.2     | 17.0      | 0.89      | 1.05     |
| Bevacizumab, Adult Dose = 10 mg/kg, Pediatric Dose = 10 mg/kg, CNS malignancies, Ref [3,4])                                  |              |                    |          |           |           |          |
| 11 months                                                                                                                    | 8            | 80                 | 158      | 112       | 1.40      | 0.71     |
| 31 months                                                                                                                    | 16           | 160                | 266      | 224       | 1.40      | 0.84     |
| 25 months                                                                                                                    | 11           | 110                | 201      | 154       | 1.40      | 0.77     |
| Infliximab, Adult Dose = 5 mg/kg, Pediatric Dose = 5 mg/kg, Crohn's disease and ulcerative colitis, Ref [5-7]                |              |                    |          |           |           |          |
| >6 years                                                                                                                     | 40           | 200                | 280      | 245       | 1.23      | 0.88     |
| 6-17 years                                                                                                                   | 45           | 225                | 318      | 263       | 1.17      | 0.83     |
| 0.7-3.1 years                                                                                                                | 15           | 75                 | 54       | 105       | 1.40      | 1.94     |
| 0.2-6.25 years                                                                                                               | 25           | 125                | 121      | 175       | 1.40      | 1.45     |
| Canakinumab, Adult Dose = 150 mg, Pediatric Dose = 2 mg/kg, if wt >40 kg then fixed dose of 150 mg SJIA, Ref [8-10]          |              |                    |          |           |           |          |
| 0.7-1.7 years                                                                                                                | 10           | 20                 | 29       | 30        | 1.50      | 1.03     |
| 2.7-4.9 years                                                                                                                | 25           | 50                 | 76       | 75        | 1.50      | 0.98     |
| 5.9-11.1 years                                                                                                               | 45           | 150                | 119      | 113       | 0.75      | 0.94     |
| 12-17.2 years                                                                                                                | 60           | 150                | 138      | 135       | 0.90      | 0.98     |
| Canakinumab, Adult Dose = 150 mg, Pediatric Dose = 2 mg/kg, if wt >40 kg then fixed dose of 150 mg CAPS, Ref [8-10]          |              |                    |          |           |           |          |
| <2 years                                                                                                                     | 18           | 36                 | 51       | 54        | 1.50      | 1.07     |
| 3.5 years                                                                                                                    | 24           | 48                 | 103      | 72        | 1.50      | 0.70     |
| 8.6 years                                                                                                                    | 35           | 150                | 141      | 98        | 0.65      | 0.69     |
| 13.5 years                                                                                                                   | 50           | 150                | 150      | 120       | 0.80      | 0.80     |
| Daclizumab, Adult Dose = 1 mg/kg, Pediatric Dose = 1 mg/kg, acute organ rejection renal transplant, Ref [11,12]              |              |                    |          |           |           |          |
| <5 years                                                                                                                     | 12           | 12                 | 28       | 17        | 1.40      | 0.60     |
| 6-12 years                                                                                                                   | 29           | 29                 | 58       | 41        | 1.40      | 0.70     |
| 13-17 years                                                                                                                  | 52           | 52                 | 78       | 57        | 1.10      | 0.74     |
| Rilonacept, Adult Dose = 320 mg, Pediatric Dose = 4.4 mg/kg, sJIA, Ref [13])                                                 |              |                    |          |           |           |          |
| <6 years                                                                                                                     | 20           | 88                 | 98       | 128       | 1.45      | 1.30     |
| 6-11 years                                                                                                                   | 40           | 176                | 222      | 224       | 1.27      | 1.01     |
| 12-17 years                                                                                                                  | 50           | 220                | 320      | 256       | 1.16      | 0.80     |
| Cetuximab, Adult Dose = 250 mg/m², Pediatric Dose = 250 mg/m², refractory Solid Tumors, Ref [14,15]                          |              |                    |          |           |           |          |
| 1-12 years                                                                                                                   | 30           | 300                | 169      | 259       | 0.86      | 1.53     |
| 13-18 years                                                                                                                  | 55           | 400                | 301      | 367       | 0.92      | 1.22     |
| Natalizumab, Adult Dose = 300 mg, Pediatric Dose = 3 mg/kg, Crohn's disease, Ref [16,17]                                     |              |                    |          |           |           |          |
| 11-17 years                                                                                                                  | 50           | 150                | 239      | 240       | 1.60      | 1.01     |
| Atezolizumab, Adult Dose = 1200 mg, Pediatric Dose = 15 mg/kg, metastatic solid tumors or hematologic malignancies, Ref [18] |              |                    |          |           |           |          |
| <2 years                                                                                                                     | 9            | 137                | 158      | 158       | 1.38      | 1.60     |
| 2-<12 years                                                                                                                  | 23           | 338                | 392      | 392       | 1.38      | 1.60     |
| 12-<18 years                                                                                                                 | 52           | 773                | 896      | 896       | 0.82      | 0.95     |
| Palivizumab, Adult Dose = 15 mg/kg, Pediatric Dose = 15 mg/kg, respiratory syncytial virus (RSV) , Ref [19,20]               |              |                    |          |           |           |          |
| 12.3 months (IM)                                                                                                             | 4.5          | 68                 | 58       | 95        | 1.39      | 1.63     |
| Tocilizumab, Adult Dose = 280 mg, Pediatric Dose = <30 kg = 10 mg/kg, >30 kg = 8 mg/kg, PJIA, Ref [21]                       |              |                    |          |           |           |          |
| 5.2 years                                                                                                                    | 20           | 200                | 119      | 112       | 0.56      | 0.94     |
| 13.1 years                                                                                                                   | 50           | 400                | 158      | 224       | 0.56      | 1.21     |
| Mepolizumab, Adult Dose = 100 mg, Pediatric Dose = <40 kg = 40 mg, ≥40 kg = 100 mg, severe eosinophilic asthma, Ref [22]     |              |                    |          |           |           |          |
| 8 years                                                                                                                      | 27           | 40                 | 45       | 54        | 1.35      | 1.20     |
| 10 years                                                                                                                     | 50           | 100                | 75       | 80        | 0.80      | 1.33     |
| Urttoxazumab, Adult Dose = 1 mg/kg, Pediatric Dose = 1 mg/kg, hemolytic-uremic syndrome, Ref [23]                            |              |                    |          |           |           |          |
| 2.9 years                                                                                                                    | 15           | 15                 | 21       | 21        | 1.40      | 1.00     |
| Abatacept, Adult Dose = 750 mg, Pediatric Dose = 10 mg/kg, JIA, Ref [24]                                                     |              |                    |          |           |           |          |
| 6-17 years                                                                                                                   | 50           | 500                | 731      | 600       | 1.20      | 0.82     |
| Belatacept, Adult Dose = 5mg/kg, Pediatric Dose = 7.5 mg/kg, kidney transplant, Ref [25,26]                                  |              |                    |          |           |           |          |
| 13-17 years                                                                                                                  | 59           | 442                | 277      | 312       | 0.70      | 1.12     |

**Eculizumab, Adult Dose = 900 mg, Pediatric Dose = 5-<10 kg = 300, 10-<20 kg, 20<30, 30-<40 kg = 600 mg, >40 kg = 900 mg, hemolytic-uremic syndrome, ref [5]**

|           |    |     |    |     |      |    |
|-----------|----|-----|----|-----|------|----|
| Not known | 8  | 300 | NA | 144 | 0.48 | NA |
|           | 15 | 600 | NA | 270 | 0.45 | NA |
|           | 25 | 600 | NA | 450 | 0.75 | NA |
|           | 35 | 600 | NA | 585 | 0.98 | NA |
|           | 50 | 900 | NA | 720 | 0.80 | NA |

**Adalimumab, Adult Dose = 40 mg, Pediatric Dose = 10-<15 kg = 10 mg, 15-<30 kg = 20 mg, 30-40 kg = 40 mg, JIA or Pediatric Uveitis, Ref [27]**

|           |    |    |    |    |      |    |
|-----------|----|----|----|----|------|----|
| Not known | 12 | 10 | NA | 10 | 0.96 | NA |
|           | 25 | 20 | NA | 20 | 1.00 | NA |
|           | 40 | 40 | NA | 28 | 0.70 | NA |

**Ustekinumab, Adult Dose = 45 mg, Pediatric Dose = 0.75 mg/kg for <60 kg, moderate to severe plaque psoriasis, Ref [28]**

|             |    |    |    |    |      |    |
|-------------|----|----|----|----|------|----|
| 12-17 years | 40 | 30 | NA | 32 | 1.05 | NA |
|-------------|----|----|----|----|------|----|

**Raxibacumab, Adult Dose = 40 mg/kg, Pediatric Dose = 80/kg (<10 kg), 60 mg/kg (>10-40 kg), 40 mg/kg (>40 mg/kg), Inhalational anthrax, Ref [29]**

|           |    |      |    |      |      |    |
|-----------|----|------|----|------|------|----|
| Not known | 10 | 800  | NA | 560  | 0.70 | NA |
|           | 25 | 1500 | NA | 1400 | 0.93 | NA |
|           | 50 | 2000 | NA | 2240 | 1.12 | NA |

**Obiltoximab, Adult Dose = 16 mg/kg, Pediatric Dose = <15 kg = 32 mg/kg, >15-40 kg = 24 mg/kg, >40 kg = 16 mg/kg, Inhalational anthrax, Ref [30]**

|           |    |     |    |     |      |    |
|-----------|----|-----|----|-----|------|----|
| Not known | 15 | 480 | NA | 336 | 0.70 | NA |
|           | 25 | 600 | NA | 560 | 0.93 | NA |

Table S2: Predicted and observed dose of polyclonal antibodies.

| Age                                                                                                                 | BW (kg) | Observed Dose (mg) |          | Predicted | Ratio     | Ratio    |
|---------------------------------------------------------------------------------------------------------------------|---------|--------------------|----------|-----------|-----------|----------|
|                                                                                                                     |         | PI based           | CL based | Salisbury | Salisbury | CL based |
| GAMMAPLEX 10% (IV), Adult Dose = 300-800 mg/kg, Pediatric Dose = 300 mg/kg, Ref [31]                                |         |                    |          |           |           |          |
| 2-5 years                                                                                                           | 15      | 4500               | NA       | 6300      | 1.40      | NA       |
| 6-11 years                                                                                                          | 20      | 6000               | NA       | 8400      | 1.40      | NA       |
| 12-15 years                                                                                                         | 50      | 15000              | NA       | 16800     | 1.12      | NA       |
| Gamunex-C (IV), Adult Dose = 300-600 mg/kg, Pediatric Dose = 300 mg/kg, Ref [32]                                    |         |                    |          |           |           |          |
| 2-5 years                                                                                                           | 15      | 4500               | NA       | 6300      | 1.40      | NA       |
| 6-11 years                                                                                                          | 20      | 6000               | NA       | 8400      | 1.40      | NA       |
| 12-15 years                                                                                                         | 50      | 15000              | NA       | 16800     | 1.12      | NA       |
| Cuvitru (SC), Adult Dose = 220 mg/kg/week, Pediatric Dose = 220 mg/kg/week, Ref [33]                                |         |                    |          |           |           |          |
| 2-<5 years                                                                                                          | 15      | 3300               | NA       | 4620      | 1.40      | NA       |
| 5-<12 years                                                                                                         | 20      | 4400               | NA       | 6160      | 1.40      | NA       |
| 12-16 years                                                                                                         | 50      | 11000              | NA       | 12320     | 1.12      | NA       |
| Panzyga (IV), Adult Dose = 300-600 mg/kg, Pediatric Dose = 300 mg/kg, Ref [34]                                      |         |                    |          |           |           |          |
| 2-<6 years                                                                                                          | 20      | 6000               | NA       | 8400      | 1.40      | NA       |
| 6-<12 years                                                                                                         | 25      | 7500               | NA       | 10500     | 1.40      | NA       |
| 12-<16 years                                                                                                        | 50      | 15000              | NA       | 16800     | 1.12      | NA       |
| Hizentra (SC), Adult Dose = 117 mg/kg, Pediatric Dose = 6-<12 years = 120 mg/kg, 12-<16 years = 115 mg/kg, Ref [35] |         |                    |          |           |           |          |
| 6-<12 years                                                                                                         | 25      | 3000               | NA       | 4095      | 1.37      | NA       |
| 12-<16 years                                                                                                        | 50      | 5750               | NA       | 6552      | 1.14      | NA       |

**Table S3: Predicted and observed dose of polyclonal antibodies in premature and term neonates.**

| <b>BW (kg)</b>                                                     | <b>Pediatric Observed Dose (mg/kg)</b> | <b>Pediatric Observed Dose (mg)</b> | <b>Pediatric Predicted Dose (mg)</b> | <b>Ratio</b> |
|--------------------------------------------------------------------|----------------------------------------|-------------------------------------|--------------------------------------|--------------|
| <b>Gammagard (IV), Adult dose = 400-600 mg/kg [36]</b>             |                                        |                                     |                                      |              |
| 1.1                                                                | 500                                    | 550                                 | 616                                  | 1.12         |
| 1.1                                                                | 750                                    | 825                                 | 616                                  | 1.12         |
| <b>Sandoglobulin (IV), Adult dose = 400-600 mg/kg [37]</b>         |                                        |                                     |                                      |              |
| 2.6                                                                | 500                                    | 1300                                | 1456                                 | 1.12         |
| <b>Gamimune (IV), term, Adult dose = 400 mg/kg (Assumed)* [38]</b> |                                        |                                     |                                      |              |
| 2.87                                                               | 250                                    | 718                                 | 1607                                 | 2.24         |
| 3.04                                                               | 500                                    | 1520                                | 1702                                 | 1.12         |
| 2.51                                                               | 1000                                   | 2510                                | 1406                                 | 0.56         |
| <b>Venoglobulin (IV), Adult dose = 400 mg/kg (Assumed)* [36]</b>   |                                        |                                     |                                      |              |
| 1.12                                                               | 1000                                   | 1120                                | 627                                  | 0.56         |
| 1.06                                                               | 750                                    | 795                                 | 594                                  | 0.75         |
| 1.16                                                               | 500                                    | 580                                 | 650                                  | 1.12         |

\*Adult dose was not known for these two polyclonal antibodies therefore, current dosing practice of an initial adult dose of 400 mg was chosen.

**Table S4: Predicted and observed dose of therapeutic protein (non-antibodies).**

| Age                                                                                                                                                  | BW (kg)     | Observed Dose (mg) |          | Predicted | Ratio     | Ratio    |
|------------------------------------------------------------------------------------------------------------------------------------------------------|-------------|--------------------|----------|-----------|-----------|----------|
|                                                                                                                                                      |             | PI based           | CL based | Salisbury | Salisbury | CL based |
| Bivalirudin, Adult Dose = 0.75 mg/kg, Pediatric Dose = 0.75/mg/kg, percutaneous coronary intervention, Ref [39–41]                                   |             |                    |          |           |           |          |
| <30 days                                                                                                                                             | 4           | 3                  | 8        | 4         | 1.41      | 0.47     |
| 31 days <2                                                                                                                                           | 8           | 6                  | 17       | 9         | 1.41      | 0.52     |
| 2-<6                                                                                                                                                 | 18          | 13                 | 28       | 19        | 1.41      | 0.69     |
| 6-<16                                                                                                                                                | 41          | 31                 | 50       | 38        | 1.23      | 0.76     |
| Darbepoetin alfa, Adult Dose = 0.5 mcg/kg, Pediatric Dose = 0.5 mcg/kg, chronic kidney disease Ref [42]                                              |             |                    |          |           |           |          |
| 1-17 y                                                                                                                                               | 35          | 18                 | 25       | 23        | 1.26      | 0.91     |
| Darbepoetin alfa, Japanese, Adult Dose = 0.41 mcg/kg, Pediatric Dose = 0.43 & 0.37 mcg/kg, chronic kidney disease Ref [43]                           |             |                    |          |           |           |          |
| <12 y                                                                                                                                                | 25          | 11                 | 16       | 14        | 1.30      | 0.87     |
| >12 y                                                                                                                                                | 40          | 15                 | 15       | 20        | 1.34      | 1.34     |
| Erythropoietin, Adult = 50 U/kg, Pediatric Dose = 50 U/kg, end stage renal failure, Ref [44,45]                                                      |             |                    |          |           |           |          |
| 9-12 y                                                                                                                                               | 27          | 1350               | 2625     | 1890      | 1.40      | 0.72     |
| >12-16 y                                                                                                                                             | 41          | 2050               | 3500     | 2485      | 1.21      | 0.71     |
| Interleukin 11, Adult = 50 mcg/kg, Pediatric Dose = 50 mcg/kg, solid tumors or lymphoma, [46]                                                        |             |                    |          |           |           |          |
| >1-3 y                                                                                                                                               | 9           | 433                | 665      | 607       | 1.40      | 0.91     |
| >3-<13                                                                                                                                               | 26          | 1319               | 1776     | 1847      | 1.40      | 1.04     |
| >13-<17                                                                                                                                              | 51          | 2532               | 3204     | 2822      | 1.11      | 0.88     |
| Drotrecogin alfa (activated), Adult Dose = 24 mcg/kg, Pediatric Dose = 24 mcg/kg, chronic kidney disease, Ref [47,48]                                |             |                    |          |           |           |          |
| <1 year                                                                                                                                              | 6           | 144                | 150      | 202       | 1.40      | 1.34     |
| 1-8 y                                                                                                                                                | 25          | 600                | 531      | 840       | 1.40      | 1.58     |
| >8-18 y                                                                                                                                              | 50          | 1200               | 796      | 1344      | 1.12      | 1.69     |
| Glulisine, SC, Adult Dose = 0.15 U/kg, Pediatric Dose = 5.9 IU for children, 9.7 IU for adolescents, type 1 diabetes, [49]                           |             |                    |          |           |           |          |
| 5-11 years                                                                                                                                           | 40          | 6                  | 9        | 7         | 1.17      | 0.78     |
| 11-17 years                                                                                                                                          | 64          | 10                 | 11       | 10        | 1.0       | 0.91     |
| Regular Human Insulin (RHI) (SC), Adult Dose = 0.15 U/kg, Pediatric Dose = 5.9 IU for children, 9.7 IU for adolescents, type 1 diabetes, Ref [49,50] |             |                    |          |           |           |          |
| 5-11 years                                                                                                                                           | 40          | 6                  | 9        | 7         | 1.17      | 0.78     |
| 11-17 years                                                                                                                                          | 64          | 10                 | 11       | 10        | 1.0       | 0.91     |
| Growth Hormone (LB03002), Adult Dose = 4.7 mg, Pediatric Dose = 0.2 mg/kg, GH deficiency, Ref [51,52]                                                |             |                    |          |           |           |          |
| 7 years                                                                                                                                              | 25          | 5                  | 2        | 2         | 0.47      | 1.0      |
| Enfuvirtide (SC), Adult Dose = 90 mg, Pediatric Dose = 2 mg/kg, HIV-1 Infection, Ref [53,54]                                                         |             |                    |          |           |           |          |
| >5-<12                                                                                                                                               | 27          | 54                 | 45       | 49        | 0.90      | 1.07     |
| >12-<17 y                                                                                                                                            | 46          | 92                 | 67       | 68        | 0.74      | 1.03     |
| Peginterferon alpha 2a, Adult Dose = 180 mcg, Pediatric Dose = 104 mcg/m², Chronic hepatitis C, Ref [55]                                             |             |                    |          |           |           |          |
| 2-8 years                                                                                                                                            | 20 (0.8 m²) | 83                 | NA       | 72        | 0.87      | NA       |

## References

- Kovarik, J.M.; Gridelli, B.G.; Martin, S.; Rodeck, B.; Melter, M.; Dunn, S.P.; Merion, R.M.; Tzakis, A.G.; Alonso, E.; Bucuvalas, J.; et al. Basiliximab in pediatric liver transplantation: A pharmacokinetic-derived dosing algorithm. *Pediatr. Transplant.* **2002**, *6*, 224–230.
- Kovarik, J.M.; Offner, G.; Broyer, M.; Niaudet, P.; Loirat, C.; Mentser, M.; Lemire, J.; Crocker, J.F.; Cochat, P.; Clark, G.; et al. A rational dosing algorithm for basiliximab (Simulect) in pediatric renal transplantation based on pharmacokinetic-dynamic evaluations. *Transplantation* **2002**, *74*, 966–971.
- Lu, J.F.; Bruno, R.; Eppler, S.; Novotny, W.; Lum, B.; Gaudreault, J. Clinical pharmacokinetics of bevacizumab in patients with solid tumors. *Cancer Chemother. Pharm.* **2008**, *62*, 779–786.
- Gojo, J.; Sauermann, R.; Knaack, U.; Slavc, I.; Peyrl, A. Pharmacokinetics of Bevacizumab in Three Patients Under the Age of 3 Years with CNS Malignancies. *Drugs R D* **2017**, *17*, 469–474.
- Temrikar, Z.H.; Suryawanshi, S.; Meibohm, B. Pharmacokinetics and Clinical Pharmacology of Monoclonal Antibodies in Pediatric Patients. *Pediatr. Drugs* **2020**, *22*, 199–216.
- Burns, J.C.; Best, B.M.; Mejias, A.; Mahony, L.; Fixler, D.E.; Jafri, H.S.; Melish, M.E.; Jackson, M.A.; Asmar, B.I.; Lang, D.J.; et al. Infliximab treatment of intravenous immunoglobulin-resistant Kawasaki disease. *J. Pediatr.* **2008**, *153*, 833–838.
- Shin, D.; Kim, Y.; Kim, Y.S.; Körnicke, T.; Fuhr, R. A Randomized, Phase I Pharmacokinetic Study Comparing SB2 and Infliximab Reference Product (Remicade) in Healthy Subjects. *BioDrugs* **2015**, *29*, 381–388.
- Sun, H.; Van, L.M.; Floch, D.; Jiang, X.; Klein, U.R.; Abrams, K.; Sunkara, G. Pharmacokinetics and Pharmacodynamics of Canakinumab in Patients With Systemic Juvenile Idiopathic Arthritis. *J. Clin. Pharmacol.* **2016**, *56*, 1516–1527.
- Kuemmerle-Deschner, J.B.; Ramos, E.; Blank, N.; Roesler, J.; Felix, S.D.; Jung, T.; Stricker, K.; Chakraborty, A.; Tannenbaum, S.; Wright, A.M.; et al. Canakinumab (ACZ885, a fully human IgG1 anti-IL-1 $\beta$  mAb) induces sustained remission in pediatric patients with cryopyrin-associated periodic syndrome (CAPS). *Arthritis Res. Ther.* **2011**, *13*, R34.

10. FDA. Package Insert of ILARIS (Canakinumab) for Cryopyrin-Associated Periodic Syndromes (CAPS); FDA: Silve Spring, MD, USA, 2006.
11. Pescovitz, M.D.; Knechtle, S.; Alexander, S.R.; Colombani, P.; Nevins, T.; Nieforth, K.; Bouw, M.R. Safety and pharmacokinetics of daclizumab in pediatric renal transplant recipients. *Pediatr. Transplant.* **2008**, *12*, 447–455.
12. FDA. Package Insert of ZENAPAX (Daclizumab) for Therapy and Management of Organ Transplant Patients; FDA: Silve Spring, MD, USA, 2003.
13. Autmizguine, J.; Cohen-Wolkowicz, M.; Iiowite, N. Rilonacept Pharmacokinetics in Children with Systemic Juvenile Idiopathic Arthritis. *J. Clin. Pharmacol.* **2015**, *55*, 39–44.
14. Trippett, T.M.; Herzog, C.; Whitlock, J.A.; Wolff, J.; Kuttlesch, J.; Bagatell, R.; Hunger, S.P.; Boklan, J.; Smith, A.A.; Arceci, R.J.; et al. Phase I and pharmacokinetic study of cetuximab and irinotecan in children with refractory solid tumors: A study of the pediatric oncology experimental therapeutic investigators' consortium. *J. Clin. Oncol.* **2009**, *27*, 5102–5208.
15. Tan, A.R.; Moore, D.F.; Hidalgo, M.; Doroshow, J.H.; Poplin, E.A.; Goodin, S.; Mauro, D.; Rubin, E.H. Pharmacokinetics of cetuximab after administration of escalating single dosing and weekly fixed dosing in patients with solid tumors. *Clin. Cancer Res.* **2006**, *12*, 6517–6522.
16. Hyams, J.S.; Wilson, D.C.; Thomas, A.; Heuschkel, R.; Mitton, S.; Mitchell, B.; Daniels, R.; A Libonati, M.; Zanker, S.; Kugathasan, S. Natalizumab Therapy for Moderate to Severe Crohn Disease in Adolescents. *J. Pediatr. Gastroenterol. Nutr.* **2007**, *44*, 185–191.
17. FDA. Package Insert of Natalizumab for Adults in Crohn Disease; FDA: Silve Spring, MD, USA, 2004.
18. Shemesh, C.S.; Chanu, P.; Jansen, K.; Wada, R.; Rossato, G.; Donaldson, F.; Garg, A.; Winter, H.; Ruppel, J.; Wang, X.; et al. Population pharmacokinetics, exposuresafety, and immunogenicity of atezolizumab in pediatric and young adult patients with cancer. *J. Immunother. Cancer* **2019**, *7*, 314.
19. Robbie, G.J.; Zhao, L.; Mondick, J.; Losonsky, G.; Roskos, L.K. Population Pharmacokinetics of Palivizumab, a Humanized Anti-Respiratory Syncytial Virus Monoclonal Antibody, in Adults and Children. *Antimicrob. Agents Chemother.* **2012**, *56*, 4927–4936.
20. FDA. Package Insert of Palivizumab for Children in Respiratory Syncytial Virus (RSV); FDA: Silve Spring, MD, USA, 1998.
21. FDA. Package Insert of Tocilizumab for Polyarticular Juvenile Idiopathic Arthritis (PJIA); FDA: Silve Spring, MD, USA, 2010.
22. Gupta, A.; Pouliquen, I.; Austin, D.; Price, R.G.; Kempford, R.; Steinfeld, J.; Bradford, E.S.; Yancey, S.W. Subcutaneous mepolizumab in children aged 6 to 11 years with severe eosinophilic asthma. *Pediatr. Pulmonol.* **2019**, *54*, 1957–1967.
23. Lopez, E.L.; Contrini, M.M.; Glatstein, E.; Ayala, S.G.; Santoro, R.; Allende, D.; Ezcurra, G.; Teplitz, E.; Koyama, T.; Matsumoto, Y.; et al. Safety and Pharmacokinetics of Urttoxazumab, a Humanized Monoclonal Antibody, against Shiga-Like Toxin 2 in Healthy Adults and in Pediatric Patients Infected with Shiga-Like Toxin-Producing Escherichia coli. *Antimicrob. Agents Chemother.* **2010**, *54*, 239–243.
24. FDA. Package Insert of Abatacept for Polyarticular Juvenile Idiopathic Arthritis (PJIA); FDA: Silve Spring, MD, USA, 2005.
25. Moudgil, A.; Dharnidharka, V.R.; Feig, D.I.; Warshaw, B.L.; Perera, V.; Murthy, B.; Roberts, M.E.; Polinsky, M.S.; Ettenger, R.B. Phase I study of single-dose pharmacokinetics and pharmacodynamics of belatacept in adolescent kidney transplant recipients. *Am. J. Transplant.* **2018**, *19*, 1218–1223.
26. Shen, J.; Townsend, R.; You, X.; Shen, Y.; Zhan, P.; Zhou, Z.; Geng, D.; Wu, D.; McGirr, N.; Soucek, K.; et al. Pharmacokinetics, Pharmacodynamics, and Immunogenicity of Belatacept in Adult Kidney Transplant Recipients. *Clin. Drug Investig.* **2013**, *34*, 117–126.
27. FDA. Package Insert of Adalimumab for Polyarticular Juvenile Idiopathic Arthritis (PJIA); FDA: Silve Spring, MD, USA, 2002.
28. FDA. Package Insert of STELARA (ustekinumab) for Moderate to Severe Plaque Psoriasis; FDA: Silve Spring, MD, USA, 2009.
29. FDA. Package Insert of Raxibacumab for Inhalational Anthrax; FDA: Silve Spring, MD, USA, 2012.
30. FDA. Package Insert of Obiltoxaximab for Inhalational Anthrax; FDA: Silve Spring, MD, USA, 2016.
31. FDA. Package Insert of Gamaplex 10%; FDA: Silve Spring, MD, USA, 2017.
32. FDA. Package Insert of GAMUNEX-C; FDA: Silve Spring, MD, USA, 2003.
33. FDA. Package Insert of Cuvitru; FDA: Silve Spring, MD, USA, 2016.
34. FDA. Package Insert of Pangyza; FDA: Silve Spring, MD, USA, 2018.
35. FDA. Package Insert of Hizentra; FDA: Silve Spring, MD, USA, 2010.
36. Noya, F.J.; Rench, M.A.; Garcia-Prats, J.A.; Jones, T.M.; Baker, C.J. Disposition of an immunoglobulin intravenous preparation in very low birth weight neonates. *J. Pediatr.* **1988**, *112*, 278–283.
37. Kyllonen, K.S.; Clapp, D.W.; Kliegman, R.M.; Baley, J.E.; Shenker, N.; Fanaroff, A.A.; Berger, M. Dosage of intravenously administered immune globulin and dosing interval required to maintain target levels of immunoglobulin G in low birth weight infants. *J. Pediatr.* **1989**, *115*, 1013–1016.
38. Weisman, L.E.; Fischer, G.W.; Marinelli, P.; Hemming, V.G.; Pierce, J.R.; Golden, S.M.; Peck, C.C. Pharmacokinetics of Intravenous Immunoglobulin in Neonates. *Vox Sang.* **1989**, *57*, 243–248.
39. Forbes, T.J.; Hijazi, Z.M.; Young, G.; Ringewald, J.M.; Aquino, P.M.; Vincent, R.N.; Qureshi, A.M.; Rome, J.J.; Rhodes, J.F.; Jones, T.K.; et al. Pediatric catheterization laboratory anticoagulation with bivalirudin. *Catheter. Cardiovasc. Interv.* **2011**, *77*, 671–679.
40. Robson, R.; White, H.; Aylward, P.; Frampton, C. Bivalirudin pharmacokinetics and pharmacodynamics: Effect of renal function, dose, and gender. *Clin. Pharmacol. Ther.* **2002**, *71*, 433–439.
41. FDA. Package Insert of ANGIOMAX (Bivalirudin) for Percutaneous Coronary Intervention; FDA: Silve Spring, MD, USA, 2000.

42. Uemura, O.; Hattori, M.; Hataya, H.; Ito, S.; Ito, N.; Akizawa, T. Pharmacokinetics of darbepoetin alfa after single, intravenous or subcutaneous administration in Japanese pediatric patients with chronic kidney disease. *Clin. Exp. Nephrol.* **2014**, *18*, 932–938.
43. Lerner, G.; Kale, A.S.; Warady, B.A.; Jabs, K.; Bunchman, T.E.; Heatherington, A.; Olson, K.; Messer-Mann, L.; Maroni, B.J. Pharmacokinetics of darbepoetin alfa in pediatric patients with chronic kidney disease. *Pediatr. Nephrol.* **2002**, *17*, 933–937.
44. Evans, J.H.; Brocklebank, J.T.; Bowmer, C.J.; Ng, P.C. Pharmacokinetics of recombinant human erythropoietin in children with renal failure. *Nephrol. Dial. Transplant.* **1991**, *6*, 709–714.
45. Kindler, J.; Eckardt, K.U.; Ehmer, B.; Jandeleit, K.; Kurtz, A.; Schreiber, A.; Scigalla, P.; Sieberth, H.G. Single-dose pharmacokinetics of recombinant human erythropoietin in patients with various degrees of renal failure. *Nephrol. Dial. Transpl.* **1989**, *4*, 345–349.
46. Cairo, M.S.; Davenport, V.; Bessmertny, O.; Goldman, S.C.; Berg, S.L.; Kreissman, S.G.; Laver, J.; Shen, V.; Secola, R.; Van De Ven, C.; et al. Phase I/II dose escalation study of recombinant human interleukin-11 following ifosfamide, carboplatin and etoposide in children, adolescents and young adults with solid tumours or lymphoma: a clinical, haematological and biological study. *Br. J. Haematol.* **2005**, *128*, 49–58.
47. Barton, P.; Kalil, A.C.; Nadel, S.; Goldstein, B.; Okhuysen-Cawley, R.; Brilli, R.J.; Takano, J.S.; Martin, L.D.; Quint, P.; Yeh, T.S.; et al. Safety, pharmacokinetics, and pharmacodynamics of drotrecogin alfa (activated) in children with severe sepsis. *Pediatrics* **2004**, *113*, 7–17.
48. FDA. Package Insert of Drotrecogin Alfa (Activated) for Sepsis; FDA: Silver Spring, MD, USA, 2004.
49. Danne, T.; Becker, R.H.A.; Heise, T.; Bittner, C.; Frick, A.D.; Rave, K. Pharmacokinetics, Prandial Glucose Control, and Safety of Insulin Glulisine in Children and Adolescents With Type 1 Diabetes. *Diabetes Care* **2005**, *28*, 2100–2105.
50. Rave, K.; Klein, O.; Frick, A.D.; Becker, R.H. Advantage of Premeal-Injected Insulin Glulisine Compared With Regular Human Insulin in Subjects With Type 1 Diabetes. *Diabetes Care* **2006**, *29*, 1812–1817.
51. Peter, F.; Savoy, C.; Ji, H.-J.; Juhasz, M.; Bidlingmaier, M.; Saenger, P. Pharmacokinetic and pharmacodynamic profile of a new sustained-release GH formulation, LB03002, in children with GH deficiency. *Eur. J. Endocrinol.* **2009**, *160*, 349–355.
52. Bidlingmaier, M.; Kim, J.; Savoy, C.; Kim, M.J.; Ebrecht, N.; de la Motte, S.; Strasburger, C.J. Comparative Pharmacokinetics and Pharmacodynamics of a New Sustained-Release Growth Hormone (GH), LB03002, Versus Daily GH in Adults with GH Deficiency. *J. Clin. Endocrinol. Metab.* **2006**, *91*, 2926–2930.
53. Zhang, X.; Lin, T.; Bertasso, A.; Evans, C.; Dorr, A.; Kolis, S.J.; Salgo, M.; Patel, I. Population Pharmacokinetics of Enfuvirtide in HIV-1-Infected Pediatric Patients Over 48 Weeks of Treatment. *J. Clin. Pharmacol.* **2007**, *47*, 510–517.
54. FDA. Package Insert of FUZEON (Enfuvirtide) for HIV-1 Infection; FDA: Silver Spring, MD, USA, 2003.
55. Schwarz, K.B.; Mohan, P.; Narkewicz, M.R.; Molleston, J.P.; Nash, S.R.; Hu, S.; Wang, K.; Gries, J.M. Safety, Efficacy and Pharmacokinetics of Peginterferon alpha2a (40 kd) in Children With Chronic Hepatitis C. *J. Pediatr. Gastroenterol. Nutr.* **2006**, *43*, 499–505.
